# Supplementary material
Source: PubMed Central journal article supplement (PMC2453510)
Supplement: supp_178_2_158__1.pdf [file supp_178_2_158__1.pdf]

**Surfactant Proteins A and D Suppress Alveolar Macrophage Phagocytosis via Interaction with SIRPa**

William J. Janssen, Kathleen A. McPhillips, Matthew G. Dickinson, Derek J. Linderman, Konosuke Morimoto, Yi Qun Xiao, Kelly M. Oldham, R. William Vandivier, Peter M. Henson, Shyra J. Gardai

ONLINE DATA SUPPLEMENT

## Supplemental Materials and Methods

### Antibodies and Reagents

Anti-SIRP $\alpha$  P84 hybridoma and SIRP $\alpha$  constructs were a gift from Dr. Axel Ullrich (1). Anti CD-47 mIAP 301 was provided by Dr. Frederik Lindberg (Washington University) (2). Soluble CD-47-Fc ligand was a gift from Dr. E. J. Brown (University of California) (3). Rabbit anti-human SP-A IgG and rabbit anti-mouse SP-A IgG antibodies were obtained from Chemicon (Temecula, CA). Rat anti-mouse CD3 was purchased from BD Biosciences (Franklin Lakes, NJ). Sodium stibogluconate and Rho-kinase inhibitor Y-27632 were purchased from Calbiochem (San Diego, CA). Purified human C1q (10 $\mu$ g/ml) was obtained from Quidel Corp (San Diego CA). Lipopolysaccharide (*Escherichia coli* O55:B5) was obtained from List Biological Laboratories (Campbell, CA).

### Animals

ICR mice (8-10 weeks old) were obtained from Taconic (Germantown, NY) and used in all murine experiments unless otherwise indicated. SP-D knockout (KO) mice were a kind gift from Dr. James Fisher (Denver, Colorado) (4). SP-D KO mice have no detectable SP-D protein in bronchoalveolar lavage fluid and SP-A levels are decreased by 25%(4). SP-D KO mice were outbred with five generations of National Institutes of Health Swiss Black mice. Age and gender-matched wild type Swiss Black controls were used in all experiments. SHP-1  $-/-$  (Ptpn6<sup>mev</sup>/Ptpn6<sup>mev</sup>) mice and littermate controls were obtained from Jackson Laboratory (Bar Harbor, Maine) at 4 weeks of age. They were housed for one week under pathogen-free

conditions before use. Wild type C57BL/6 mice and green fluorescent protein (GFP)-expressing mice (C57BL/6-Tg(UBC-GFP)30Scha/J) were also obtained from Jackson Laboratory.

### **Generation of Chimeric GFP-Expressing Mice**

Bone marrow cells were isolated under sterile conditions from the hindlimbs of 4 week-old GFP-expressing donor mice. Briefly, femurs and tibias were removed from donor mice and extra muscle and connective tissue were mechanically dissociated. Marrow cells were liberated by gently crushing the bones and then filtering cell isolates through a 70- $\mu$ m mesh (BD Biosciences) in DMEM supplemented with 10% FCS. Cell suspensions were centrifuged for 10 minutes at 200g and decanted. Pellets were resuspended in sterile HBSS, filtered through a 40- $\mu$ m mesh, and centrifuged at 200g. Following a third wash step, the cells were resuspended in HBSS at a concentration of  $25 \times 10^7$  cells/ml. Recipient C57BL/6 mice were sedated with Avertin and then exposed to 9 Gy of total body irradiation. To protect resident alveolar macrophages from radiation injury, lead strips (1 cm thick x 2 cm wide) were positioned directly over the thorax. A total of  $5 \times 10^7$  GFP-expressing cells were transplanted via lateral tail vein injections into recipient animals in a volume of 0.2 ml. Resulting chimeric mice were characterized by GFP-negative resident alveolar macrophages and GFP-positive hematopoietic cells. Chimeric mice were housed under specific pathogen-free (SPF) conditions with antibiotic-containing food. LPS (200  $\mu$ g in 50  $\mu$ l PBS) was administered via direct intratracheal injection 4 weeks after transplantation, a time at which over 90% of RAM were of host origin (GFP-negative) and greater than 95% of peripheral blood leukocytes were of donor origin (GFP-positive).

### **Isolation of Primary Cells**

Human alveolar macrophages (AMs) were isolated by bronchoalveolar lavage (BAL) from normal volunteers (7). Human AMs were plated in 24-well tissue culture plates (BD Biosciences, Franklin Lakes NJ) at  $1 \times 10^6$  AMs/well, allowed to adhere for 30 min, washed with X-vivo medium (Biowhittaker, Wakersville MA), and incubated for an additional 2 h before experimentation. Human neutrophils were obtained from healthy donors and isolated via density centrifugation as previously described (8).

Mouse AMs were isolated immediately after euthanasia of the animals with intraperitoneal pentobarbital (Abbott Laboratories, North Chicago, IL). BAL was performed ten times on each mouse using 1 ml aliquots of ice-cold PBS supplemented with 100 $\mu$ M EDTA. Cell suspensions were centrifuged at 200g for five minutes, excess fluid was decanted and AM were resuspended in culture media. For experiments in which AM were isolated from LPS-treated mice, purification was performed as previously described (9). Briefly, BAL samples were centrifuged, washed once in Hanks balanced salt solution (HBSS), layered over a Percoll gradient (78%, 66%, and 54%) and centrifuged at 1060g for 30 minutes. Cytospin samples of the 66%: 54% interface contained more than 90% macrophages.

Mouse peritoneal macrophages (PMs) were isolated from mice following euthanasia with inhaled CO<sub>2</sub>. Peritoneal lavage was performed with 10ml of ice-cold HBSS. Lavage fluid was centrifuged and PMs were resuspended in DMEM supplemented with 10% fetal calf serum and plated overnight in culture.

Murine thymocytes were isolated from the thymuses of 4-week-old, female C57 BL/6 mice. Thymuses were removed freshly euthanized animals and then gently ground through a sterile 40- $\mu$ m strainer (Fisher Scientific) to separate individual cells. The cells were washed twice in PBS before use.

### **Transient Cell Transfection with SIRP $\alpha$**

Active SIRP $\alpha$  constructs and mutant SIRP $\alpha$  constructs were obtained from Dr. Axel Ullrich (Martinsried, Germany). In the mutant constructs, all 4 tyrosines in the intracellular domain were replaced with asparagine to render the molecule inactive (12). Swiss 3T3 cells, which do not contain SIRP $\alpha$  de novo, were plated in 6-well plates ( $3.0 \times 10^5$  cells/ml) for 24 hrs.

Transfection was carried out using Lipofectamine Plus reagent (Invitrogen, Carlsbad, CA) according to the manufacturer's instructions. After 48 hours, the cells were pre-treated with SP-A (10 $\mu$ g/ml) and CD47-Fc (10  $\mu$ g/ml) for 20 minutes, washed once to remove unbound protein, and then incubated with Jurkat T-cells as above.

### **Induction of Apoptosis**

Apoptosis was induced in Jurkat T cells, murine thymocytes, and human neutrophils by exposure to ultraviolet radiation (254 nm) for 10 minutes as described previously (13). Jurkat T cells or murine thymocytes were cultured in RPMI 1640 supplemented with 10% fetal bovine serum at 37°C in 5% CO<sub>2</sub> for 3 h before use. Apoptosis was verified by nuclear condensation using light microscopy on Wright-Giemsa stained samples. Flow cytometry confirmed that greater than 85% of cells treated in this fashion were annexin V positive. Approximately 25% were propidium iodide positive. Human neutrophils were cultured in RPMI 1640 containing 0.5% BSA at 37°C for 90 minutes. Apoptosis was then assessed by light microscopy on Wright-Giemsa stained samples every 20 minutes. Neutrophils were deemed ready for use when 80% of neutrophils exhibited nuclear condensation.

## **Flow Cytometry**

BAL samples were fixed in 4% paraformaldehyde immediately after BAL. Cells were then suspended in HBSS containing 2% FBS (Atlanta Biologicals, Atlanta, GA) at a concentration of  $10^6$  cells per 100 $\mu$ l. Fc $\gamma$ R was blocked using mAb 2.4G2 (Becton Dickinson, Mountain View, CA). Cells were incubated with 1 $\mu$ g of primary antibody on ice for 30 minutes, washed twice, and then incubated with secondary antibody (1:50 dilution) on ice for 30 minutes. Flow cytometry was performed using a FACScan cytometer (Becton Dickinson). Data were collected using Cellquest software (Becton Dickinson) and analyzed with Flowjo software (Tree Star, Ashland, OR). Cell sorting was performed on fresh BAL specimens resuspended in DMEM with 10% FBS using a MoFlo cell sorter (Dako, Denmark). For cell sorting and flow cytometry experiments, resident AM and recruited mononuclear phagocytes were distinguished from each other and from neutrophils based on forward-scatter, side-scatter, and FL1 autofluorescence.

## References

- E1. Stofega MR, Argetsinger LS, Wang H, Ullrich A, Carter-Su C. Negative regulation of growth hormone receptor/jak2 signaling by signal regulatory protein alpha. *The Journal of biological chemistry* 2000;275:28222-28229.
- E2. Lindberg FP, Bullard DC, Caver TE, Gresham HD, Beaudet AL, Brown EJ. Decreased resistance to bacterial infection and granulocyte defects in iap-deficient mice. *Science* 1996;274:795-798.
- E3. Latour S, Tanaka H, Demeure C, Mateo V, Rubio M, Brown EJ, Maliszewski C, Lindberg FP, Oldenborg A, Ullrich A, et al. Bidirectional negative regulation of human t and dendritic cells by cd47 and its cognate receptor signal-regulator protein-alpha: Down-regulation of il-12 responsiveness and inhibition of dendritic cell activation. *J Immunol* 2001;167:2547-2554.
- E4. Korfhagen TR, Sheftelyevich V, Burhans MS, Bruno MD, Ross GF, Wert SE, Stahlman MT, Jobe AH, Ikegami M, Whitsett JA, et al. Surfactant protein-d regulates surfactant phospholipid homeostasis in vivo. *The Journal of biological chemistry* 1998;273:28438-28443.
- E5. Allen MJ, Voelker DR, Mason RJ. Interactions of surfactant proteins a and d with saccharomyces cerevisiae and aspergillus fumigatus. *Infection and immunity* 2001;69:2037-2044.
- E6. Gardai SJ, Xiao YQ, Dickinson M, Nick JA, Voelker DR, Greene KE, Henson PM. By binding sirpalpha or calreticulin/cd91, lung collectins act as dual function surveillance molecules to suppress or enhance inflammation. *Cell* 2003;115:13-23.
- E7. Vandivier RW, Ogden CA, Fadok VA, Hoffmann PR, Brown KK, Botto M, Walport MJ, Fisher JH, Henson PM, Greene KE. Role of surfactant proteins a, d, and c1q in the clearance of

apoptotic cells in vivo and in vitro: Calreticulin and cd91 as a common collectin receptor complex. *J Immunol* 2002;169:3978-3986.

E8. Whitlock BB, Gardai S, Fadok V, Bratton D, Henson PM. Differential roles for alpha(m)beta(2) integrin clustering or activation in the control of apoptosis via regulation of akt and erk survival mechanisms. *J Cell Biol* 2000;151:1305-1320.

E9. Suratt BT, Petty JM, Young SK, Malcolm KC, Lieber JG, Nick JA, Gonzalo JA, Henson PM, Worthen GS. Role of the cxcr4/sdf-1 chemokine axis in circulating neutrophil homeostasis. *Blood* 2004;104:565-571.

E10. Ridley AJ, Hall A. The small gtp-binding protein rho regulates the assembly of focal adhesions and actin stress fibers in response to growth factors. *Cell* 1992;70:389-399.

E11. Fadok VA, Bratton DL, Konowal A, Freed PW, Westcott JY, Henson PM. Macrophages that have ingested apoptotic cells in vitro inhibit proinflammatory cytokine production through autocrine/paracrine mechanisms involving tgf-beta, pge2, and paf. *The Journal of clinical investigation* 1998;101:890-898.

E12. Neznanov N, Neznanova L, Kondratov RV, O'Rourke DM, Ullrich A, Gudkov AV. The ability of protein tyrosine phosphatase shp-1 to suppress nfkappab can be inhibited by dominant negative mutant of sirpalha. *DNA and cell biology* 2004;23:175-182.

E13. Vandivier RW, Fadok VA, Ogden CA, Hoffmann PR, Brain JD, Accurso FJ, Fisher JH, Greene KE, Henson PM. Impaired clearance of apoptotic cells from cystic fibrosis airways. *Chest* 2002;121:89S.

E14. Vandivier RW, Fadok VA, Hoffmann PR, Bratton DL, Penvari C, Brown KK, Brain JD, Accurso FJ, Henson PM. Elastase-mediated phosphatidylserine receptor cleavage impairs



apoptotic cell clearance in cystic fibrosis and bronchiectasis. *The Journal of clinical investigation* 2002;109:661-670.
